# Supplementary material for: Connectivity between sea turtles off Jeju Island on the Korean Peninsula, and other populations in the western Pacific
Source: Frontiers journal article supplement (doi:10.3389/fmars.2024.1281897), 2024-02-16
Supplement: Table_1.xlsx [file Table_1.xlsx]

## Sheet: Table S1
Supplementary Table 1.Sampling information and haplotype identification of the mitochondrial control region sequences derived from Jeju sea turtles
Sample ID*	Tag ID†	Species	Sampling(bychatch) date	sample type	Haplotype (long)	Haplotype (short)
TB_#2	724923	Caretta caretta	2021.06.17	Blood	CcP2.1	Haplotype B
TB_#3	-	Caretta caretta	2021.07.11	Blood	CcP2.1	Haplotype B
TB_#4	-	Caretta caretta	2019.08.27	Blood	CcP2.3	Haplotype B
#14	-	Caretta caretta	2022.05.22	Tissue	CcP2.1	Haplotype B
#15	-	Caretta caretta	2021.10.11	Tissue	CcP2.1	Haplotype B
CCGE	-	Caretta caretta	2015.09.08	Tissue	CcP2.1	Haplotype B
CCHL	-	Caretta caretta	2014.11.17	Tissue	CcP2.1	Haplotype B
CCSH	-	Caretta caretta	2015.08.09	Tissue	CcP1.1	Haplotype A
CMSPC	53759	Chelonia mydas	2015.06.26	Tissue	CmP50.1	CmP50
#2	-	Chelonia mydas	2021.09.17	Tissue	CmP57.2	CmP57
#4	-	Chelonia mydas	2022.05.15	Tissue	CmP50.1	CmP50
#6	-	Chelonia mydas	2018.04.18	Tissue	CmP39.1	CmP39
#8	-	Chelonia mydas	2022.06.03	Tissue	CmP54.1	CmP54
#9	-	Chelonia mydas	2021.09.04	Tissue	CmP39.1	CmP39
#10	-	Chelonia mydas	2021.10.25	Tissue	CmP39.1	CmP39
#11	-	Chelonia mydas	2022.06.02	Tissue	CmP54.1	CmP54
#12	-	Chelonia mydas	2022.05.14	Tissue	CmP39.1	CmP39
#13	-	Chelonia mydas	2022.05.07	Tissue	CmP39.1	CmP39
#16	-	Chelonia mydas	2021.08.18	Tissue	CmP50.1	CmP50
#17	-	Chelonia mydas	2020.10.10	Tissue	CmP50.1	CmP50
#18	718339	Chelonia mydas	2020.09.28	Tissue	CmP213.1	CmP213
#19	-	Chelonia mydas	2022.06.06	Tissue	CmP50.1	CmP50
#20	724927	Chelonia mydas	2022.05.02	Tissue	-	-
#21	724926	Chelonia mydas	2022.04.27	Tissue	CmP39.1	CmP39
#22	718338	Chelonia mydas	2020.09.24	Tissue	CmP50.1	CmP50
CMGN	-	Chelonia mydas	2013.07.29	Tissue	CmP39.1	CmP39
CMAW	-	Chelonia mydas	2014.08.05	Tissue	CmP39.1	CmP39
#5	-	Dermochelys coriacea	2022.01.03	Tissue	Dc 9.1	Haplotype I
#3	-	Eretmochelys imbricata	2021.09.03	Tissue	EiIP08	EiIP08
#7	-	Eretmochelys imbricata	2022.04.03	Tissue	EiIP140	EiIP140
#1	-	Lepidochelys olivacea	2021.11.20	Tissue	Lo107	Lo107
TB_#1	-	Lepidochelys olivacea	2019.09.13	Blood	Lo108	Lo108
*Sample ID used in the laboratory.
†ID used for satellite tracking

## Sheet: Table S2
Supplementary Table 2. Distribution and frequency of mitochondrial haplotypes among green turtle rookeries and foraging aggregations in the northwestern Pacific
Locality	Reference	Aggregate*	Sum	Clade V†		IV			VIII																		III																VII
				CmP44	CmP98	CmP47	CmP77	CmP18	CMJ39	CmP19	CmP40	CmP49	CmP50	CmP53	CmP91	CmP57	CmP87	CmP103	CmP104	CmP116	CmP130	CmP132 (CMJ34)	CmP154	CmP210	CmP219	CmP247	CMJ5	CMJ7	CMJ10	CmP20	CmP22	CmP32	CmP54	CmP61	CmP67	CmP76	CMJ41	CmP106	CmP122	CmP212	CmP214	CmP244	CmP37	CmP39	CmP51	CmP70	CmP82	CmP79	CmP95
Jeju, Republic of Korea	This study	F	18	0	0	0	0	0	0	0	0	0	6	0	0	1	0	0	0	0	0	0	0	0	0	0	0	0	0	0	0	0	2	0	0	0	0	0	0	0	0	0	0	8	0	0	0	0	0
northwestern Amami Oshima (nAM), central Ryukyu, Japan	Hamabata et al., 2014	R	9	0	0	0	0	0	0	0	0	2	0	0	0	0	0	0	0	0	0	0	0	0	0	0	0	0	0	0	0	0	0	0	0	0	0	0	0	0	0	0	0	6	0	1	0	0	0
Kakeromajima-Ukejima-Yorojima (KUY), central Ryukyu, Japan	Hamabata et al., 2014	R	12	0	0	0	0	0	0	0	0	0	7	0	0	0	0	0	0	0	0	0	0	0	0	0	0	0	0	0	0	0	0	0	0	0	0	0	0	0	0	0	0	3	0	1	0	0	0
Okinoerabujima (OE), central Ryukyu, Japan	Hamabata et al., 2014	R	19	0	0	0	0	0	0	0	0	2	12	1	0	0	0	0	0	0	0	0	0	0	0	0	0	0	0	0	0	0	0	0	0	0	0	0	0	0	0	0	0	3	0	0	0	0	0
Yoronjima (YR), central Ryukyu, Japan	Hamabata et al., 2014	R	7	0	0	0	0	0	0	0	0	0	4	3	0	0	0	0	0	0	0	0	0	0	0	0	0	0	0	0	0	0	0	0	0	0	0	0	0	0	0	0	0	0	0	0	0	0	0
northern Okinawajima (nOK), central Ryukyu, Japan	Hamabata et al., 2014	R	7	0	0	0	0	0	0	0	0	0	1	1	0	0	0	0	0	0	0	0	0	0	0	0	0	0	0	0	0	0	0	0	0	0	0	0	0	0	0	0	0	5	0	0	0	0	0
central western Okinawajima (cOK), central Ryukyu, Japan	Hamabata et al., 2014	R	5	0	0	0	0	0	0	0	0	0	2	1	0	0	0	0	0	0	0	0	0	0	0	0	0	0	0	0	0	0	0	0	0	0	0	0	0	0	0	0	0	1	0	1	0	0	0
Zamamijima (ZM), central Ryukyu, Japan	Hamabata et al., 2014	R	11	0	0	0	0	0	0	0	0	0	8	0	0	0	0	0	0	0	0	0	0	0	0	0	0	0	0	1	0	0	0	0	0	0	0	0	0	0	0	0	0	1	0	0	0	0	0
Ishigakijima (IS), Yaeyama, southern Ryukyu, Japan	Nishizawa et al., 2011	R	41	0	0	0	2	0	0	0	0	0	2	0	0	0	0	0	0	0	0	0	0	0	0	0	0	0	0	5	0	0	24	0	0	0	0	0	0	0	0	0	0	5	0	0	0	0	0
southwestern Iriomote (sIR), Yaeyama, southern Ryukyu, Japan	Nishizawa et al., 2011; Hamabata et al., 2014	R	34	0	0	0	0	0	0	0	0	0	14	1	0	0	0	0	0	0	0	0	0	0	0	0	0	0	0	1	0	0	17	0	0	0	0	0	0	0	0	0	0	0	0	0	0	0	0
Ogasawara (OG), Japan	Nishiawa et al., 2013	R	103	0	0	0	0	0	0	0	0	4	13	2	0	0	0	0	0	0	2	0	0	0	0	0	0	0	0	0	0	0	1	0	0	0	0	0	0	0	0	0	1	53	0	0	0	0	2
Wan-an Island (WA), Taiwan	Cheng et al., 2008	R	40	0	0	0	0	26	0	1	0	0	0	0	0	0	0	0	0	0	0	0	0	0	0	0	0	0	0	13	0	0	0	0	0	0	0	0	0	0	0	0	0	0	0	0	0	0	0
Lanyu Island (LY), Taiwan	Cheng et al., 2008	R	14	0	0	0	0	0	0	0	0	14	0	0	0	0	0	0	0	0	0	0	0	0	0	0	0	0	0	0	0	0	0	0	0	0	0	0	0	0	0	0	0	0	0	0	0	0	0
Hong Kong (HK)	Ng et al., 2014	R	6	0	0	0	0	5	0	0	0	0	0	0	0	0	0	0	0	1	0	0	0	0	0	0	0	0	0	0	0	0	0	0	0	0	0	0	0	0	0	0	0	0	0	0	0	0	0
Nomaike (NM), Japan	Hamabata et al., 2015	F	38	0	0	0	0	0	0	0	0	2	3	1	0	0	0	0	0	0	1	0	0	0	0	0	0	0	0	1	0	2	2	0	0	0	0	0	0	0	0	0	0	21	0	0	0	1	0
Muroto (MR), Japan	Hamabata et al., 2015	F	93	0	0	0	0	1	0	0	0	1	18	0	0	0	0	0	0	0	1	0	0	0	0	0	0	0	0	1	0	0	5	0	0	0	0	0	1	0	0	0	0	50	1	0	0	2	2
Kumano-nada (KM), Japan	Hamabata et al., 2015	F	31	0	0	0	0	0	0	0	0	0	3	2	0	0	0	0	0	0	0	0	0	1	0	0	0	0	0	0	0	0	0	0	0	0	0	0	2	0	0	0	0	17	0	0	0	0	1
Oita (OT), Japan	Kudo et al., 2021	F	21	0	0	0	0	0	0	0	0	0	2	1	0	0	0	0	0	0	0	0	0	0	0	0	0	0	0	0	0	0	1	0	0	0	0	0	0	0	0	0	0	12	0	0	0	1	0
Kanto (KT), Japan	Nishizawa et al., 2013	F	47	0	0	0	0	0	1	0	0	0	16	2	0	0	0	0	0	0	1	0	0	0	0	1	0	0	0	2	0	0	2	0	0	0	1	0	0	0	0	0	0	18	0	0	0	0	0
Sanriku (SR), Japan	Nishizawa et al., 2014	F	39	0	0	0	0	0	0	0	0	0	8	0	0	0	0	0	0	0	0	0	0	0	0	0	0	0	0	1	0	0	0	0	0	0	0	0	0	0	0	0	0	22	0	2	0	0	0
Yaeyama (YY), southern Ryukyu, Japan	Nishiawa et al., 2013; Hamabata et al., 2018	F	376	1	0	1	10	1	0	2	0	12	67	9	2	10	0	0	0	0	0	2	0	0	0	0	1	1	1	100	7	23	17	15	2	0	0	0	2	0	1	0	0	59	1	1	0	1	0
Okinawa (OK), central Ryukyu, Japan	Nishiawa et al., 2013; Hayashi et al., 2015; Hamabata et al., 2018	F	104	0	0	0	1	2	0	0	0	2	24	4	0	1	0	0	0	0	0	0	0	0	0	0	0	0	0	26	1	3	7	2	0	1	0	1	0	1	0	0	0	18	0	0	0	2	0
South China region	Ng et al., 2017	F	111	0	1	0	3	2	0	14	1	12	11	2	7	7	3	1	1	0	0	1	1	0	1	0	0	0	0	21	3	5	5	0	0	0	0	0	0	0	0	0	0	7	0	0	1	0	0
*R, Rookery; F, Foraging aggregation including samples bycaught or stranded
[truncated: 15 more columns]

## Sheet: Table S3
Supplementary Table 3. Distribution and frequency of mitochondrial haplotypes for green turtle foraging aggregations in the northwestern Pacific, based on long fragments (>700 bp)
Locality	Reference	Sum	Clade V	Clade VIII																			Clade III											Clade VII													Clade IX
			CmP98.1	CmP18.1	CmP19.1	CmP40.1	CmP49.1	CmP49.3	CmP49.5	CmP50.1	CmP53.1	CmP57.1	CmP57.2	CmP87.1	CmP91.1	CmP132.1	CmP103.1	CmP104.1	CmP130.1	CmP154.1	CmP210.1	CmP219.1	CmP20.1	CmP20.3	CmP20.4	CmP22.1	CmP22.3	CmP32.1	CmP54.1	CmP61.1	CmP77.1	CmP122.1	Cmp214.1	CmP39.1	CmP39.2	CmP51.1	CmP70.1	CmP82.1	CmP79.1	CmP95.1	CmP121.1	CmP126.1	CmP127.1	CmP128.1	CmP131.1	CmP213.1	CmP1.1	CmP3.1	CmP4.1
Jeju, Republic of Korea	This study	18	0	0	0	0	0	0	0	6	0	0	1	0	0	0	0	0	0	0	0	0	0	0	0	0	0	0	2	0	0	0	0	8	0	0	0	0	0	0	0	0	0	0	0	1	0	0	0
Nomaike (NM), Japan	Hamabata et al., 2015	38	0	0	0	0	2	0	0	3	1	0	0	0	0	0	0	0	1	0	0	0	1	0	0	0	0	2	2	0	0	0	0	21	0	0	0	0	1	0	0	0	2	1	0	1	0	0	0
Muroto (MR), Japan	Hamabata et al., 2015	93	0	1	0	0	1	0	0	18	0	0	0	0	0	0	0	0	1	0	0	0	0	1	0	0	0	0	5	0	0	1	0	49	1	1	0	0	2	2	2	1	1	1	1	0	0	0	0
Kumano-nada (KM), Japan	Hamabata et al., 2015	31	0	0	0	0	0	0	0	3	2	0	0	0	0	0	0	0	0	0	1	0	0	0	0	0	0	0	0	0	0	2	0	17	0	0	0	0	0	1	2	0	1	0	0	0	0	0	1
Oita (OT), Japan	Kudo et al., 2021	21	0	0	0	0	0	0	0	2	1	0	0	0	0	0	0	0	0	0	0	0	0	0	0	0	0	0	1	0	0	0	0	12	0	0	0	0	1	0	0	0	3	0	0	0	1	0	0
Sanriku (SR), Japan	Nishizawa et al., 2014	39	0	0	0	0	0	0	0	8	0	0	0	0	0	0	0	0	0	0	0	0	1	0	0	0	0	0	0	0	0	0	0	22	0	0	2	0	0	0	1	0	1	0	0	0	2	1	0
Okinawa, central Ryukyu, Japan	Hamabata et al., 2018	45	0	2	0	0	1	0	0	15	2	0	0	0	0	0	0	0	0	0	0	0	10	1	1	0	1	2	2	1	0	0	0	5	0	0	0	0	0	0	0	1	0	1	0	0	0	0	0
Yaeyama (YY), southern Ryukyu, Japan	Hamabata et al., 2018	75	0	0	0	0	4	0	0	16	2	0	0	0	0	0	0	0	0	0	0	0	15	0	1	2	0	1	5	4	2	0	1	18	0	1	0	0	0	0	1	0	2	0	0	0	0	0	0
South China region	Ng et al., 2017	111	1	2	14	1	7	4	1	11	2	4	3	3	7	1	1	1	0	1	0	1	19	2	0	3	0	5	5	0	3	0	0	7	0	0	0	1	0	0	0	1	0	0	0	0	0	0	0
[truncated: 5 more columns]

## Sheet: Table S4
Supplementary Table 4. Distribution and frequency of mitochondrial haplotypes for loggerhead turtle rookeries and foraging aggregations in the north Pacific
Region	Locality	References	Aggregate*		Haplotype A (CcP1)†	Haplotype B (CcP2)							Haplotype C (CcP3)
				SUM	CcP1.1‡	CcP2.1	CcP2.2	CcP2.3	CcP2.4	CcP2.5	CcP2.6	CcP2.7	CcP3.1	CcP3.2	CcP7.1	CcP10.1
western Pacific	Jeju, Republic of Korea	This study	F	8	1	6	0	1	0	0	0	0	0	0	0	0
western Pacific	Chiba (CB), Japan	Matsuzawa et al., 2016	R	10	0	4	2	1	0	0	0	0	3	0	0	0
western Pacific	Shizuoka (SZ), Japan	Matsuzawa et al., 2016	R	38	0	20	5	3	0	0	0	0	9	1	0	0
western Pacific	Ise Bay (IB), Japan	Matsuzawa et al., 2016	R	11	0	4	1	3	0	0	0	0	3	0	0	0
western Pacific	Minabe (MN), Japan	Matsuzawa et al., 2016	R	101	0	74	9	13	1	0	0	0	2	2	0	0
western Pacific	Shikoku (SK), Japan	Matsuzawa et al., 2016	R	55	0	28	7	13	0	0	0	0	7	0	0	0
western Pacific	Miyazaki (MY), Japan	Matsuzawa et al., 2016	R	61	0	37	5	9	0	0	0	0	10	0	0	0
western Pacific	Shibushi Bay (SB), Japan	Matsuzawa et al., 2016	R	25	0	18	0	2	0	0	0	0	5	0	0	0
western Pacific	Yakushima (YK), northern Ryukyu, Japan	Matsuzawa et al., 2016	R	108	4	78	1	3	0	0	0	0	22	0	0	0
western Pacific	Amami (AM), central Ryukyu, Japan	Matsuzawa et al., 2016	R	53	6	23	0	17	0	1	0	0	6	0	0	0
western Pacific	Okinoerabu (OE), central Ryukyu, Japan	Matsuzawa et al., 2016	R	24	6	11	0	4	0	0	0	0	3	0	0	0
western Pacific	Okinawa (OK) - Zamami (ZM), central Ryukyu, Japan	Matsuzawa et al., 2016	R	70	22	28	0	9	0	0	0	0	11	0	0	0
western Pacific	Yaeyama (YY), southern Ryukyu, Japan	Matsuzawa et al., 2016	R	6	2	2	0	0	0	0	0	0	2	0	0	0
western Pacific	Sanriku (SR), Japan	Nishizawa et al., 2014a	F	107	1	74	4	8	0	0	1	1	15	1	1	1
north Pacific	drift-net, North Pacific (NP)-Pelagic	Bowen et al., 1995	F	34	1	28	-	-	-	-	-	-	5	-	-	-
eastern Pacific	Baja California (BC), Mexico	Bowen et al., 1995	F	26	2	19	-	-	-	-	-	-	5	-	-	-
"-", There is no information available for the long fragments.
*R, Rookery; F, Foraging aggregation including samples bycaught or stranded
†short fragment (350 bp) based on Bowen et al., (1995); ‡ long fragment (>800 bp) based on Dutton et al., (2013)

## Sheet: Table S5
Supplementary Table 5. Distribution and frequency of mitochondrial haplotypes for hawksbill turtle rookeries and foraging aggregations in the Pacific
Region	Locality	Reference	Aggregate*	Sum	Indo-Pacific I																																			Indo-Pacific II	Indo-Pacific III
					EiIP03†	EiIP05	EiIP08	EiIP23	EiIP24	EiIP28	EiIP31	EiIP33	EiIP34	EiIP37	EiIP38	EiIP43	EiIP45	EiIP47	EiIP51	EiIP57	EiIP71	EiIP74	EiIP81	EiIP103	EiIP104	EiIP106	EiIP107	EiIP108	EiIP114	EiIP115	EiIP116	EiIP117	EiIP121	EiIP125	EiIP126	EiIP127	EiIP132	EiIP135	EiIP140	EiIP17	EiIP02	EiIP07	EiIP09	EiIP26	EiIP29	EiIP48	EiIP49	EiIP50	EiIP53
western Pacific	Jeju, Republic of Korea†	This study	F	2	0	0	1	0	0	0	0	0	0	0	0	0	0	0	0	0	0	0	0	0	0	0	0	0	0	0	0	0	0	0	0	0	0	0	1	0	0	0	0	0	0	0	0	0	0
western Pacific	Western Australia, Australia (WA)	Vargas et al., 2016	R	47	0	0	37	0	0	3	0	0	0	3	4	0	0	0	0	0	0	0	0	0	0	0	0	0	0	0	0	0	0	0	0	0	0	0	0	0	0	0	0	0	0	0	0	0	0
western Pacific	Northeast Arnhem Land, Northern Territory (NT), Australia	Vargas et al., 2016	R	71	0	0	36	0	0	0	1	0	0	0	0	0	0	0	0	0	0	0	1	0	0	0	0	0	0	0	0	0	0	0	0	0	0	0	0	0	0	0	30	2	0	0	0	0	0
western Pacific	Milman Island, north Queensland (nQL), Australia	Vargas et al., 2016	R	62	0	1	26	0	0	0	1	3	0	0	0	0	0	0	0	1	0	0	0	0	0	0	0	0	0	0	0	0	0	0	0	0	0	0	0	0	1	6	21	0	2	0	0	0	0
western Pacific	Solomon Islands (SI)	Vargas et al., 2016	R	24	18	0	0	2	1	0	0	17	3	0	0	1	0	0	0	0	0	0	0	0	0	0	0	0	0	0	0	0	0	0	0	0	0	0	0	0	0	0	0	0	0	0	0	0	0
western Pacific	East Malaysia, Malaysia (EM)	Vargas et al., 2016; Nishizawa et al., 2016	R	157	0	0	0	0	0	0	0	0	0	0	0	0	0	61	4	0	0	0	0	0	0	0	0	0	0	0	0	0	0	1	0	0	0	0	0	1	0	0	0	0	0	45	43	1	1
western Pacific	Peninsula Malaysia (PM), Malaysia	Vargas et al., 2016; Nishizawa et al., 2016	R	89	0	0	0	0	0	0	0	0	0	0	0	0	0	0	0	0	0	0	0	0	0	0	0	0	0	0	0	0	0	0	0	0	0	0	0	0	0	0	0	0	0	0	1	0	82
western Pacific	East Malaysia (EM), Malaysia	Nishizawa et al., 2016	F	15	0	0	0	0	0	0	0	2	0	0	0	0	3	1	0	0	1	1	0	0	0	0	0	0	0	0	1	0	1	1	0	0	0	0	0	0	0	0	0	0	0	0	0	0	0
western Pacific	Melaka, Peninsula Malaysia (PM), Malaysia	Nishizawa et al., 2016	F	8	0	0	1	0	0	0	0	1	0	0	0	0	0	0	0	0	0	0	0	0	0	0	0	0	0	0	0	0	0	0	0	0	0	0	0	0	0	0	0	0	0	0	0	0	6
eastern Pacific	Mexico (MX)	Gaos et al., 2018 and Zuñiga-Marroquin and Monteros, 2017	R	21	0	0	0	4	0	0	0	17	0	0	0	0	0	0	0	0	0	0	0	0	0	0	0	0	0	0	0	0	0	0	0	0	0	0	0	0	0	0	0	0	0	0	0	0	0
eastern Pacific	Central America (CA)	Gaos et al., 2018	R	249	0	0	0	7	0	0	0	121	0	0	0	0	0	0	0	0	0	18	0	0	0	92	1	6	2	2	0	0	0	0	0	0	0	0	0	0	0	0	0	0	0	0	0	0	0
eastern Pacific	Ecuador (South America, SA)	Gaos et al., 2018	R	31	0	0	0	0	0	0	0	30	0	0	0	0	0	0	0	0	0	1	0	0	0	0	0	0	0	0	0	0	0	0	0	0	0	0	0	0	0	0	0	0	0	0	0	0	0
eastern Pacific	Hawaii (HW), USA	Gaos et al., 2020	R	108	0	0	0	4	0	0	0	34	0	0	0	0	0	0	0	0	0	49	0	20	1	0	0	0	0	0	0	0	0	0	0	0	0	0	0	0	0	0	0	0	0	0	0	0	0
eastern Pacific	Mexico (MX)	Gaos et al., 2018	F	77	0	0	0	39	0	0	0	33	0	0	0	0	0	0	0	0	0	2	0	0	0	0	0	0	0	3	0	0	0	0	0	0	0	0	0	0	0	0	0	0	0	0	0	0	0
eastern Pacific	Central America (CA)	Gaos et al., 2018	F	389	0	0	0	9	0	0	0	135	0	0	0	0	0	0	0	0	0	132	0	0	0	95	0	2	1	13	0	1	0	0	0	0	1	0	0	0	0	0	0	0	0	0	0	0	0
eastern Pacific	South America (SA)	Gaos et al., 2018	F	67	1	0	0	0	0	0	0	52	0	0	0	0	0	0	0	0	0	12	0	0	0	0	0	0	0	0	0	0	0	0	1	2	0	0	0	0	0	0	0	0	0	0	0	0	0
eastern Pacific	Hawaii (HW), USA	Gaos et al., 2020	F	28	1	0	0	8	0	0	0	9	0	0	0	0	0	0	0	0	0	9	0	0	1	0	0	0	0	0	0	0	0	0	0	0	0	1	0	0	0	0	0	0	0	0	0	0	0
*R, Rookery; F, Foraging aggregation including samples bycaught or stranded
†Haplotypes with prefix 'EIJ' reported from Korean peninsula (Kim et al. 2020) and Japan Archipelago (Nishizawa et al. 2010; Nishizawa et al. 2012) was exluded in this data due to different sequence length.
[truncated: 9 more columns]

## Sheet: Table S6
Supplementary Table 6. Distribution and frequency of mitochondrial haplotypes for olive ridley turtle rookeries and foraging aggregations in the Pacific
Region	Locality	Ref	Aggregate*	Sum	Indian West Pacfic (IWP)																									Indian	East Pacific (EP)
					Lo1	Lo2	Lo3	Lo4	Lo5	Lo6	Lo7	Lo8	Lo9	Lo10	Lo11	Lo12	Lo13	Lo14/Lo18	Lo15	Lo16	Lo17	Lo19	Lo20	Lo21	Lo22	Lo23	Lo25	Lo106	Lo107	Lo37	Lo27	Lo28	Lo31	Lo34	Lo35	Lo46/Lo68	Lo52	Lo53	Lo54/89	Lo55	Lo57	Lo59	Lo60	Lo61	Lo62	Lo71	Lo73	Lo83	Lo87
western Pacific	Jeju, Republic of Korea	This study	F	2	0	0	0	0	0	0	0	0	0	0	0	0	0	0	0	0	0	0	0	0	0	0	0	1	1	0	0	0	0	0	0	0	0	0	0	0	0	0	0	0	0	0	0	0	0
western Pacific	mainland, Republic of Korea	Kim et al., 2019	F	2	0	0	0	0	0	0	0	0	0	0	0	0	0	0	0	0	0	0	0	0	0	0	0	0	0	0	0	0	0	0	0	2	0	0	0	0	0	0	0	0	0	0	0	0	0
western Pacific	Peninsula Malaysia (PM), Malaysia	Vilaça et al., 2022	R	2	2	0	0	0	0	0	0	0	0	0	0	0	0	0	0	0	0	0	0	0	0	0	0	0	0	0	0	0	0	0	0	0	0	0	0	0	0	0	0	0	0	0	0	0	0
western Pacific	Alas Purwo of East Java-southern part of Bali, Lesser Sunda (LS), Indonesia	Adnyana et al., 2020	R	22	2	0	0	1	0	0	0	0	0	0	0	0	0	0	0	0	0	13	0	0	0	0	6	0	0	0	0	0	0	0	0	0	0	0	0	0	0	0	0	0	0	0	0	0	0
western Pacific	Jamursba Medi-Kaironi, Papua (PP)	Adnyana et al., 2020	R	16	0	0	0	0	0	0	2	0	0	0	0	0	0	7	0	1	3	0	0	0	1	2	0	0	0	0	0	0	0	0	0	0	0	0	0	0	0	0	0	0	0	0	0	0	0
western Pacific	Northern Territory (NT), Austalia	Jensen et al., 2013	R	75	58	10	1	3	1	0	0	0	0	0	0	0	0	0	1	0	0	0	0	1	0	0	0	0	0	0	0	0	0	0	0	0	0	0	0	0	0	0	0	0	0	0	0	0	0
western Pacific	Flinders Beach, north Queensland (nQL), Austalia	Jensen et al., 2013	R	27	9	2	9	0	0	0	0	0	0	0	0	0	0	0	6	0	0	0	0	0	0	0	0	0	0	0	1	0	0	0	0	0	0	0	0	0	0	0	0	0	0	0	0	0	0
western Pacific	eastern Gulf of Carpentaria (eGoC), Austalia	Jensen et al., 2013	F	23	12	0	0	0	0	0	1	0	0	1	2	0	1	0	0	2	1	0	0	0	2	1	0	0	0	0	0	0	0	0	0	0	0	0	0	0	0	0	0	0	0	0	0	0	0
western Pacific	western Gulf of Carpentaria (wGoC), Austalia	Jensen et al., 2013	F	21	4	1	0	2	0	1	1	1	1	1	1	1	1	2	0	1	0	1	1	1	0	0	0	0	0	0	0	0	0	0	0	0	0	0	0	0	0	0	0	0	0	0	0	0	0
eastern Pacific	Baja California (BC), Mexico	Vilaça et al., 2022	R	8	0	0	0	0	0	0	0	0	0	0	0	0	0	0	0	0	0	0	0	0	0	0	0	0	0	0	0	0	0	0	0	6	0	0	0	0	0	1	0	0	0	1	0	0	0
eastern Pacific	Mexico (MX)	Campista-León et al., 2019 , Pinou et al., 2018, Vilaça et al., 2022	R	96	0	0	0	0	0	0	0	0	0	0	0	0	0	0	0	0	0	0	0	0	0	0	0	0	0	0	3	3	2	1	2	56	2	0	8	0	3	1	6	5	0	0	0	1	0
eastern Pacific	Mexico (MX)	Martín-del-Campo et al., 2023	F	85	0	0	0	0	0	0	0	0	0	0	0	0	0	0	0	0	0	0	0	0	0	0	0	0	0	1	2	1	1	1	1	54	3	1	8	0	1	4	3	1	1	1	0	0	1
eastern Pacific	Costa Rica (CR)	Silver-Georges 2020, Duchene et al., 2012, Vilaça et al., 2022	R	74	0	0	0	0	0	0	0	0	0	0	0	0	0	0	0	0	0	0	0	0	0	0	0	0	0	0	2	0	2	0	0	46	6	0	7	1	4	0	3	0	1	0	1	0	0
eastern Pacific	East Pacific (EP)-Foraging	Vilaça et al., 2022	F	6	0	0	0	0	0	0	0	0	0	0	0	0	0	0	0	0	0	0	0	0	0	0	0	0	0	0	0	0	0	0	0	6	0	0	0	0	0	0	0	0	0	0	0	0	0
*R, Rookery; F, Foraging aggregation including samples bycaught or stranded
[truncated: 4 more columns]

## Sheet: Table S7
Supplementary Table 7. Distribution and frequency of mitochondrial haplotypes for leatherback turtle rookeries and foraging aggregations in the Pacific
Region	Location	Ref	Aggregate*	Sum	A	D	E	F	G	H	I	K	L
western Pacific	Jeju, Republic of Korea	This study	F	1	0	0	0	0	0	0	1	0	0
western Pacific	mainland, Republic of Korea	Cho et al., 2018	F	1	0	0	0	0	0	0	1	0	0
western Pacific	Japan (JP)	Yoshikawa et al., 2016	N	16	0	0	1	0	0	0	15	0	0
western Pacific	Kamiali, Papua New Guinea (PNG)	Dutton et al., 2007	N	18	1	1	1	0	0	0	15	0	0
western Pacific	Jamursba Medi-War Mon, Papua (PP)	Dutton et al., 2007	N	40	1	1	1	0	0	0	37	0	0
western Pacific	Solomon Islands (SL)	Dutton et al., 1999	N	48	2	1	1	1	0	3	40	0	0
western Pacific	Terengganu, Peninsula Malaysia, Malaysia (PM)	Dutton et al., 1999	N	9	3	2	3	0	0	1	0	0	0
eastern Pacific	﻿Playa Mexiquillo, Mexico (MX)	Dutton et al., 1999	N	18	0	8	0	0	2	6	0	1	1
eastern Pacific	Playa Grande, Cosat Rica	Dutton et al., 1999	N	25	0	14	0	1	3	4	0	2	1
*R, Rookery; F, Foraging aggregation including samples bycaught or stranded

## Sheet: Table S8
Supplementary Table 8. Genetic diversity of green turtles (C. mydas) in north Pacific foraging grounds based on long fragments (>700 bp)
Foraging ground	N†	L (bp)	H†	h†	SD	π†	SD
Jeju*	18	703	5	0.7124	0.0743	0.0217	0.0114
Nomaike1	38	703	12	0.6913	0.0823	0.0171	0.0088
Muroto1	93	713	20	0.6861	0.0469	0.0166	0.0084
Kumano-nada1	31	712	10	0.6946	0.0888	0.0173	0.009
Oita2	21	703	7	0.6667	0.1073	0.0139	0.0074
Sanriku3	39	703	9	0.6478	0.0745	0.016	0.0083
Okinawa4	45	715	14	0.8343	0.0391	0.0265	0.0133
Yaeyama5	75	713	15	0.8544	0.0211	0.0251	0.0125
South China	111	707	27	0.9301	0.0109	0.0245	0.0121
References: *Samples from this study, 1Hamabata et al. (2015), 2Kudo et al. (2021), 3Nishizawa et al. (2014b)
†N, number of sequences; L, sequence length; H, number of haplotypes; h, haplotype diversity; π, nucleotide diversity

## Sheet: Table S9
Supplementary Table 9. Source contributions (%) of western Pacific green turtle rookeries to the Jeju foraging ground
Location of source rookeries	Mean	Confidence Interval
		0.025	0.975
Japan (JP)	0.895722	0.720153	0.990113
Hong Kong (HK)/Taiwan (TW)	0.0043093	8.85875e-23	0.0452461
Xisha (XS)	0.00471637	5.20259e-23	0.0499855
Peninsula Malaysia (PM)	0.00431079	6.11115e-23	0.0458482
western Borneo (wBR)	0.00450731	5.15382e-23	0.0474229
Sulu Sea (SS)	0.0361652	2.30326e-18	0.177286
northeast Borneo (nBR)	0.0145621	7.2487e-22	0.123605
eastern Borneo (eBR)	0.0139166	4.4694e-22	0.120904
Palau (PL)	0.00430351	3.71059e-23	0.0460577
Micronesia (MC)	0.00424281	7.98563e-23	0.0443401
CNMI/Guam (CG)	0.00444006	3.9705e-23	0.0468047
Marshall (MS)	0.00427378	4.31872e-23	0.0453335
northern New Guinea (nNG)	0.00453057	3.82368e-23	0.0477105

## Sheet: Table S10
Supplementary Table 10. Genetic diversity of loggerhead turtles (C. caretta) in north Pacific foraging grounds
Foraging ground	N†	L (bp) †	H†	h†	SD	π†	SD
Jeju*	8	350	2	0.25	0.1802	0.0029	0.0025
		808	3	0.4643	0.2	0.0019	0.0014
Sanriku1	107	350	3	0.298	0.0492	0.0043	0.0029
		808	10	0.4992	0.0543	0.003	0.0018
Baja California2	26	350	3	0.44	0.1017	0.006	0.0039
North Pacific pelagic2	34	350	3	0.3084	0.0919	0.0043	0.003
1References: *This study; 1Nishizawa et al. (2014a); 2Bowen et al. (1995)
†N, Number of sample size; L, sequence length; H, number of haplotypes; h, haplotype diversity; π, nucleotide diversity

[truncated: 1 more sheets: Table S11]
